# Supplementary material for: Genome-Wide Association Study Dissecting the Genetic Architecture Underlying the Branch Angle Trait in Rapeseed (Brassica napus L.)
Source: PubMed Central journal article supplement (PMC5028734; doi:10.1038/srep33673), 2016-09-20
Supplement: srep33673-s1.pdf [file srep33673-s1.pdf]

Supplementary Information for

# Genome-Wide Association Study Dissecting the Genetic Architecture Underlying the Branch Angle Trait in Rapeseed (*Brassica napus* L.)

Chengming Sun<sup>1</sup>, Benqi Wang<sup>1</sup>, Xiaohua Wang<sup>1</sup>, Kaining Hu<sup>1</sup>, Kaidi Li<sup>1</sup>, Zhanyu Li<sup>1</sup>, San Li<sup>1</sup>, Lei Yan<sup>1</sup>, Chunyun Guan<sup>2</sup>, Jiefu Zhang<sup>3</sup>, Zhenqian Zhang<sup>2</sup>, Song Chen<sup>3</sup>, Jing Wen<sup>1</sup>, Jinxing Tu<sup>1</sup>, Jinxiong Shen<sup>1</sup>, Tingdong Fu<sup>1</sup> and Bin Yi<sup>1,\*</sup>

<sup>1</sup>Huazhong Agricultural University, National Key Laboratory of Crop Genetic Improvement, National Sub-center of Rapeseed Improvement in Wuhan, Wuhan, 430070, China

<sup>2</sup>Hunan Agricultural University, College of Agronomy, Changsha, 410128, China

<sup>3</sup>Jiangsu Academy of Agricultural Science, Key Laboratory of Cotton and Rapeseed, Nanjing, 210014, China

[\\*yibin@mail.hzau.edu.cn](mailto:*yibin@mail.hzau.edu.cn)

## Supplementary Figure

**Supplementary Figure S1.** Overall genome-wide decay of linkage disequilibrium (LD).

**Supplementary Figure S2.** Enhance allele number of large and small branch angle lines.

**Supplementary Figure S3.** Gene Ontology (GO) enrichment diagram of genes locating within the linkage disequilibrium (LD) decay ranges of significant loci.

## Supplementary Table

**Supplementary Table S1.** Correlations analysis of branch angle in four environments.

**Supplementary Table S2.** ANOVA analysis of branch angle in four environments.

**Supplementary Table S3.** Correlations between branch angle and other traits of 2013/2014 Changsha.

**Supplementary Table S4.** Linkage disequilibrium (LD) decay on A and C subgenome chromosomes in the 520 rapeseed accessions.

## **Supplementary Dataset**

**Supplementary Data S1.** Branch angle of all branches for 30 lines.

**Supplementary Data S2.** Supplementary Data S2. The phenotypic data for all accessions in four environments and BLUP values and the broad-sense heritability for four environments.

**Supplementary Data S3.** Genotyping scores of all the polymorphic SNPs for the association panel.

**Supplementary Data S4.** Information of the 530 association panel and group information based on population structure.

**Supplementary Data S5.** Data of population structure and kinship for the association panel.

**Supplementary Data S6.** Gene Ontology (GO) enrichment analysis of genes locating within the linkage disequilibrium (LD) decay ranges of significant loci.

**Supplementary Data S7.** SNPs and candidate genes significantly associated with branch angle.

**Supplementary Data S8.** 2012/2013 and 2013/2014 meteorological data of four environments.

### Genome-wide LD decay

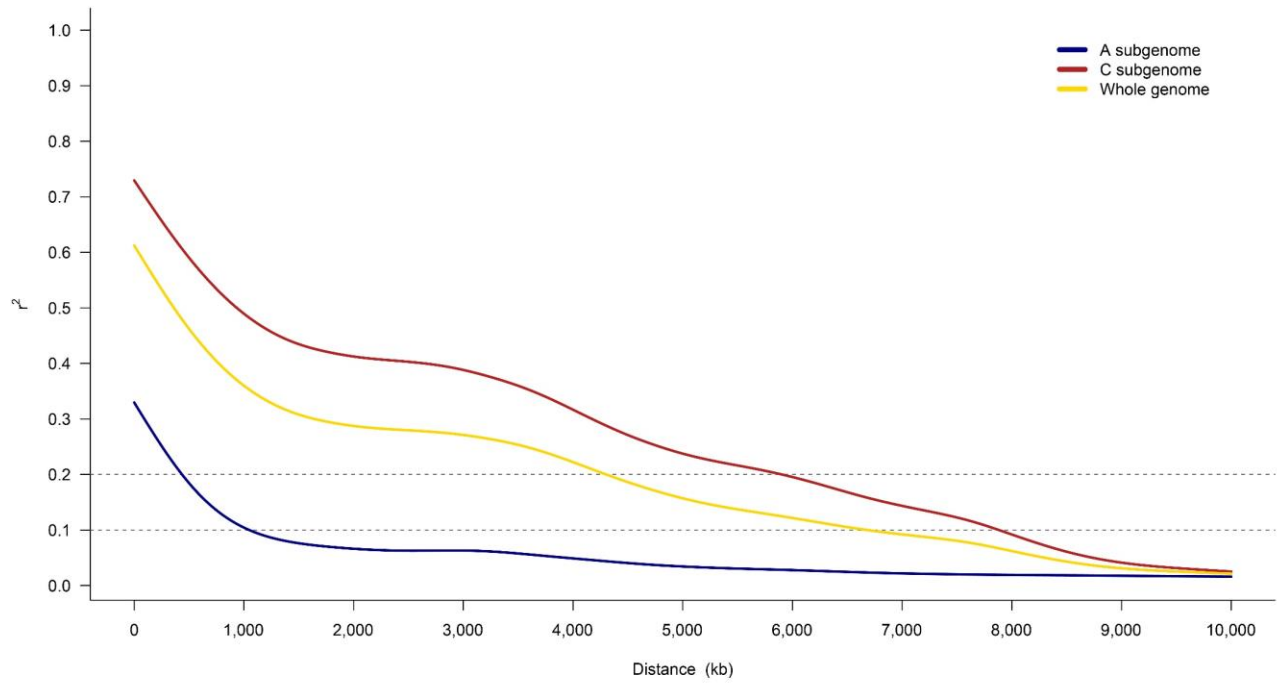

**Supplementary Figure S1.** Overall genome-wide decay of linkage disequilibrium (LD), shown as smoothed  $r^2$  for all marker pairs on A, C subgenome and whole genome depending on the distance between marker pairs.

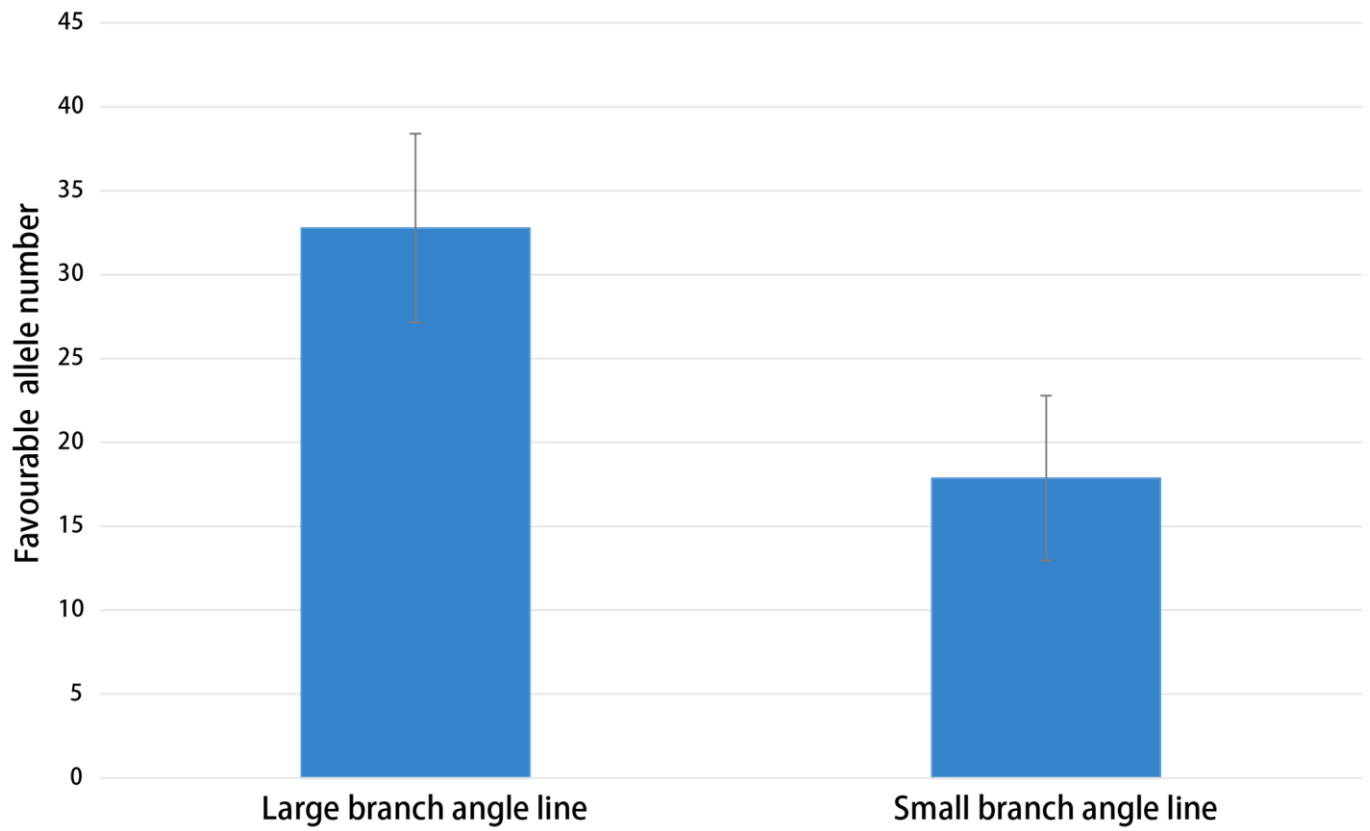

**Supplementary Figure S2.** Favourable allele number of large and small branch angle lines.

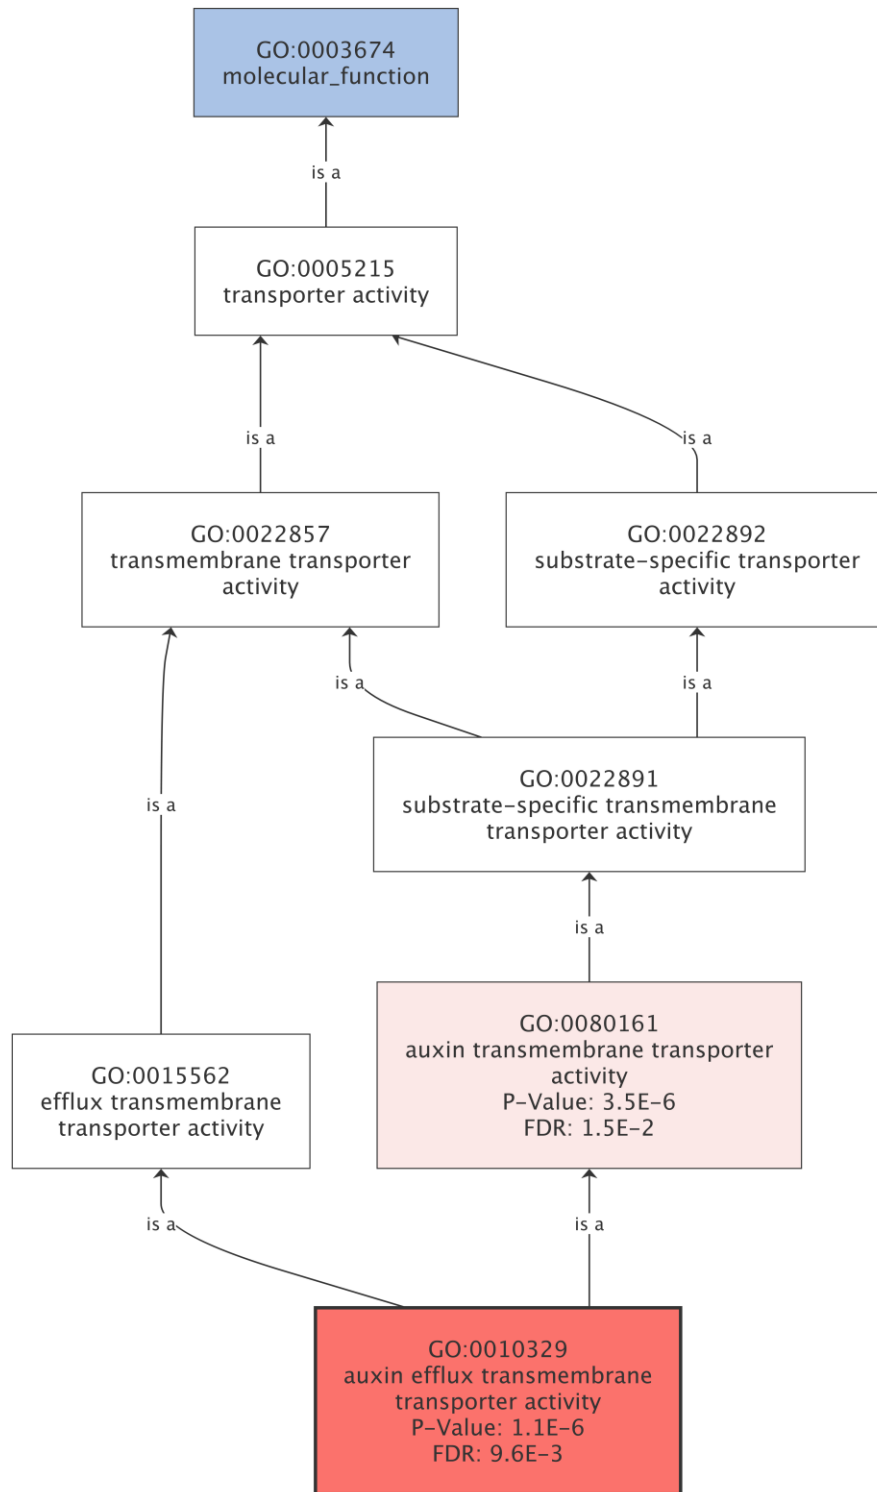

**Supplementary Figure S3.** Gene Ontology (GO) enrichment diagram of genes locating within the linkage disequilibrium (LD) decay ranges of significant loci.

| Environment        | 2012/2013 Changsha | 2012/2013 Nanjing | 2013/2014 Changsha |
|--------------------|--------------------|-------------------|--------------------|
| 2012/2013 Nanjing  | 0.58***            |                   |                    |
| 2013/2014 Changsha | 0.59***            | 0.54***           |                    |
| 2013/2014 Wuhan    | 0.68***            | 0.58***           | 0.63***            |

**Supplementary Table S1.** Correlations analysis of branch angle in four environments. \* $p \leq$

0.05; \*\*  $p \leq 0.01$ ; \*\*\*  $p \leq 0.001$ .

| Source    | DF    | Sum Sq | Mean Sq | F value | Pr(>F) |     |
|-----------|-------|--------|---------|---------|--------|-----|
| Line      | 519   | 294304 | 567     | 32.341  | <2e-16 | *** |
| Loc       | 2     | 1647   | 824     | 46.968  | <2e-16 | *** |
| Year      | 1     | 13117  | 13117   | 748.091 | <2e-16 | *** |
| Line:Loc  | 1033  | 78106  | 76      | 4.312   | <2e-16 | *** |
| Line:Year | 517   | 30312  | 59      | 3.344   | <2e-16 | *** |
| Residuals | 14072 | 246732 | 18      |         |        |     |

**Supplementary Table S2.** ANOVA analysis of branch angle in four environments. \* $p \leq 0.05$ ;

\*\*  $p \leq 0.01$ ; \*\*\*  $p \leq 0.001$ .

| Trait | BA      | PH      | BN      | MIPN   | PL      | SNPP |
|-------|---------|---------|---------|--------|---------|------|
| PH    | 0.24*** |         |         |        |         |      |
| BN    | 0.1***  | 0.25*** |         |        |         |      |
| MIPN  | 0.08**  | 0.32*** | 0.08*   |        |         |      |
| PL    | 0.11*** | 0.38*** | 0.09**  | 0.09** |         |      |
| SNPP  | 0.13*** | 0.32*** | 0.02    | 0.06*  | 0.57*** |      |
| SW    | 0.11*** | 0.18*** | -0.09** | 0.2*** | 0.31*** | 0.03 |

**Supplementary Table S3.** Correlations between branch angle and other traits in the 2013/2014 Changsha samples. BA:

branch angle; PH: plant height; BN: branch number; MIPN: main inflorescence pod number; PL: pod length; SNPP: seed

number per pod; Seed yield were not investigated. The significance level: \* $p \leq 0.05$ ; \*\*  $p \leq 0.01$ ; \*\*\*  $p \leq 0.001$ .



| Subgenome    | Chromosome | No. of SNPs | LD decay (Kb) |           |
|--------------|------------|-------------|---------------|-----------|
|              |            |             | $r^2=0.1$     | $r^2=0.2$ |
| A subgenome  | A1         | 729         | 827           | 303       |
|              | A2         | 552         | 824           | 285       |
|              | A3         | 1041        | 729           | 225       |
|              | A4         | 762         | 827           | 278       |
|              | A5         | 761         | 873           | 356       |
|              | A6         | 747         | 796           | 236       |
|              | A7         | 939         | 708           | 254       |
|              | A8         | 504         | 4940          | 1254      |
|              | A9         | 748         | 2155          | 873       |
|              | A10        | 825         | 4264          | 764       |
| C subgenome  | A1-A10     | 7608        | 1046          | 439       |
|              | C1         | 1726        | 8278          | 7768      |
|              | C2         | 1611        | 8704          | 4493      |
|              | C3         | 1901        | 1039          | 507       |
|              | C4         | 2252        | 5845          | 4866      |
|              | C5         | 558         | 1282          | 732       |
|              | C6         | 837         | 1218          | 658       |
|              | C7         | 1110        | 6496          | 908       |
|              | C8         | 999         | 6944          | 6342      |
|              | C9         | 565         | 2968          | 1085      |
| Whole genome | C1-C9      | 11559       | 8278          | 7768      |
|              | A1-C9      | 19167       | 6660          | 4311      |

**Supplementary Table S4.** Linkage disequilibrium (LD) decay on A and C subgenome chromosomes in

the 520 rapeseed accessions.
